# Supplementary material
Source: publisher figshare collection journal article supplement (https://frontiersin.figshare.com/ndownloader/files/32113256)
Supplement: Supplementary file [file 32113256]

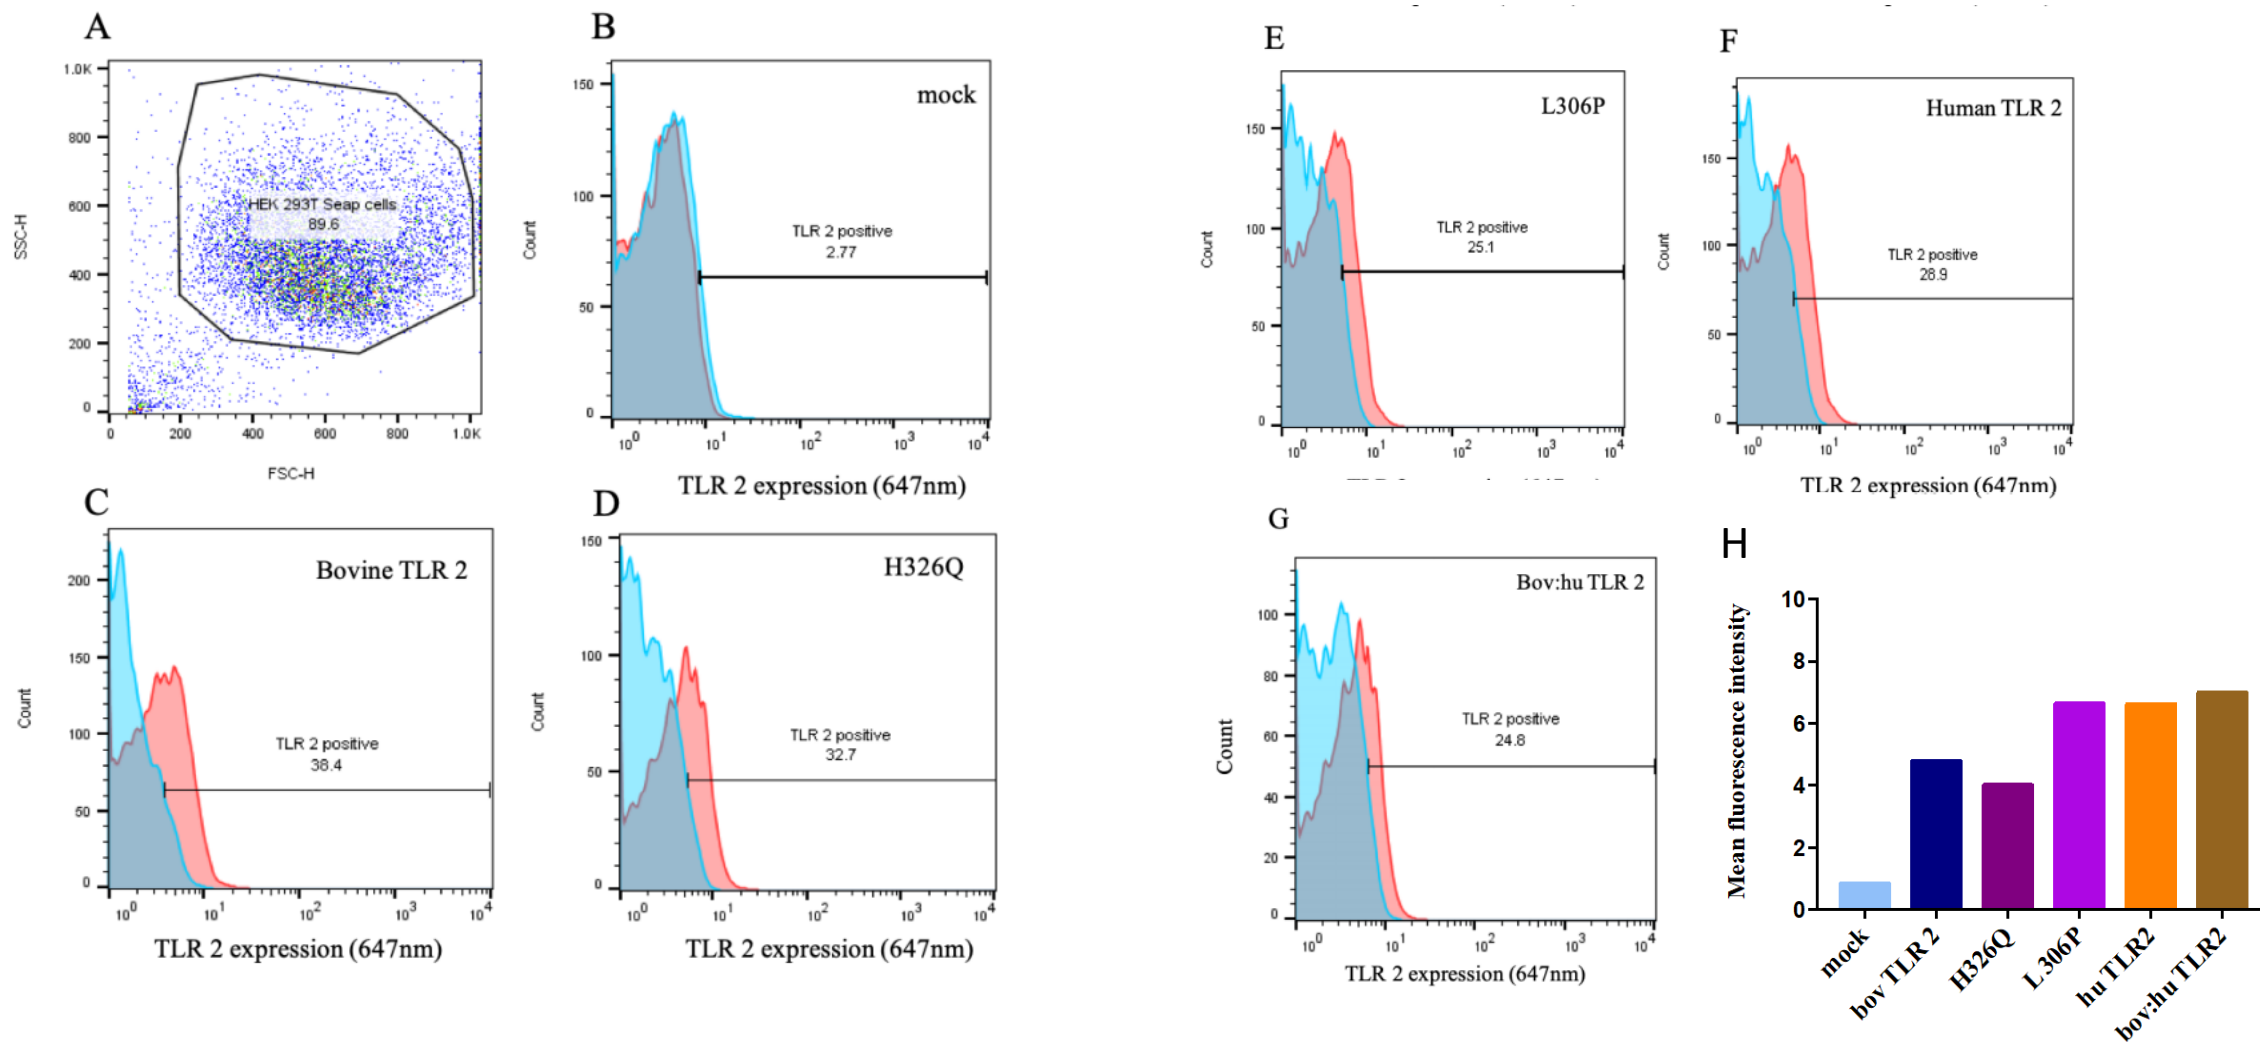

**Figure S1: TLR2 receptor expression in HEK 293 SEAP cells upon transient transfection.** Upon transient transfection with different TLR2 constructs, surface expression of TLR2 by HEK 293 SEAP cells was detected by immune-labelling using human anti-bovine CD282 antibody or mouse anti-human CD282 antibody conjugated with Alexa Fluor 647. HuCAL Fab-dHLX-MH antibody was used as a negative control.. A total of 10,000 events were recorded per construct by a FACS Calibur E3160 using Cell Quest Pro acquisition software (BD Biosciences, UK). Data was analysed using FlowJo V10 (FlowJo LLC, USA). Gating of SEAP cell population was based on forward-side scatter (A) and gating strategy was used for all constructs (B-G). Images represent the sum of three independent transient transfections per construct. The mean fluorescent intensity of cells from three independent transient transfections per construct is shown (H)

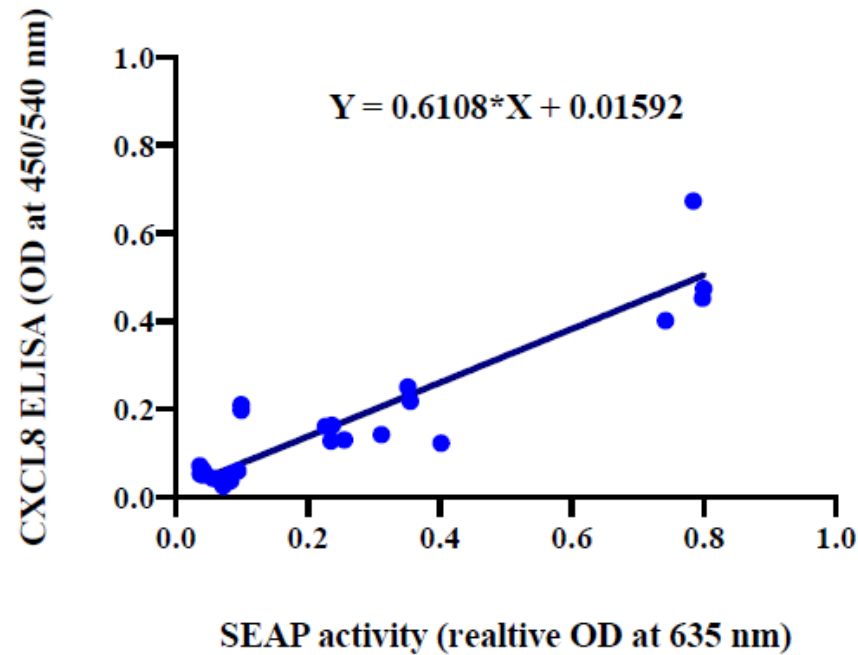

**Supplementary Figure S2: Correlation of ODs measured in SEAP reporter and CXCL8 ELISA assay**

ODs measured in the same supernatants of transfectants stimulated with FSL-1 at 100 ng/ml (Invivogen, USA), Pam<sup>3</sup>CSK<sup>4</sup> at 1 mg/ml (Invivogen, USA) and their controls, measured in the SEAP assay and human CXCL8 ELISA assay using Quantikine Human CXCL8/IL-8 ELISA kit (R&D Systems, USA) were analysed for correlation between both assays. Spearman's correlation was implemented and found to be significant with a strong degree of correlation ( $r=0.7537$ ,  $p<0.0001$ ). To display this correlation, a dot plot fitted with Deming's regression line was drawn. Deming's regression line and equation are shown for one representative experiment. Data analysed and displayed with GraphPad Prism V8 (GraphPad Inc., USA)

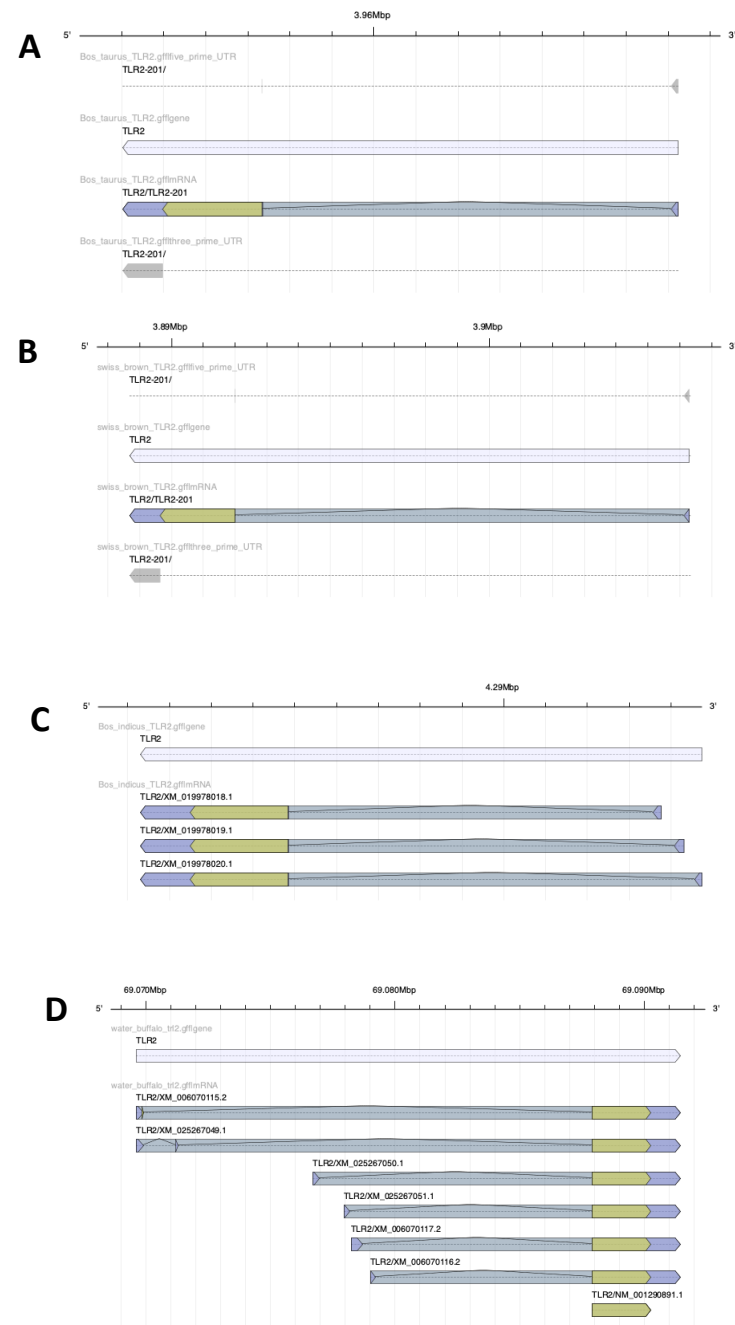

## Supplementary Figure S3: TLR2 Gene Models

Gene models were created for TLR2 to represent *B. taurus* **(A)**, Brown Swiss **(B)**, *B. indicus* **(C)** and *B. bubalis* **(D)** identify the number of possible transcripts.

## Water Buffalo S
